# Supplementary material for: Interfacial microenvironment regulation of FeOOH/S-Co heterostructure catalysts via S atoms for overall water splitting
Source: Royal Society of Chemistry journal article supplement (doi:10.1039/d3ta05613a), 2023-01-01
Supplement: d3ta05613a1.pdf [file d3ta05613a1.pdf]

## Supporting Information

### **Interfacial Microenvironment Regulation of FeOOH/S-Co Heterostructure Catalyst via S Atoms for Overall Water Splitting**

Zehao Zang<sup>†</sup>, Yangyang Ren<sup>†</sup>, Xiang Li<sup>‡</sup>, Yahui Cheng<sup>§</sup>, Lanlan Li<sup>†</sup>, Xiaofei Yu<sup>†</sup>,

Xiaojing Yang<sup>†</sup>, Zunming Lu<sup>†</sup>, Xinghua Zhang<sup>†,\*</sup>, Hui Liu<sup>//,\*</sup>

<sup>†</sup>School of Materials Science and Engineering, Hebei University of Technology,  
Tianjin 300130, China

<sup>‡</sup>Graduate School, Hebei University of Technology, Tianjin 300401, China

<sup>§</sup>Tianjin Key Laboratory of Process Control and Green Technology for  
Pharmaceutical Industry, Department of Electronics, Nankai University, Tianjin  
300350, China

<sup>//</sup>School of Materials Science and Engineering, Tianjin University, Tianjin 300072,  
China.

---

\* Corresponding author, Email: zhangxinghua@hebut.edu.cn; hui\_liu@tju.edu.cn.

## Experimental Sections

**Preparation of the Co/NF.** The Co/NF catalyst was synthesized through a typical electrodeposition method in a two-electrode cell on a digital control DC power supply. Nickel foam (NF,  $2 \times 3 \text{ cm}^2$ ) and carbon paper (CP,  $2 \times 3 \text{ cm}^2$ ) were served as cathode and anode, respectively. All the electrodeposition was performed at room temperature and the distance between cathode and anode electrodes was maintained at 3 cm. The NF was washed by 3.0 M HCl, water and ethanol, and the CP was also washed by water and ethanol. To obtain Co/NF, 50 mM  $\text{CoCl}_2 \cdot 6\text{H}_2\text{O}$  and 1.25 M  $\text{NH}_4\text{F}$  were added into 50 mL deionized water to form electrolytes. After different deposition potential attempts, the electrodeposition process was finally conducted at 3.5 V for 0.5 h at room temperature. Then the sample was washed and dried in the air. The loading of Co/NF catalyst is  $13.3 \text{ mg cm}^{-2}$ .

**Preparation of the FeOOH/NF.** The FeOOH/NF catalyst was also synthesized via electrodeposition. However, this process was carried out on CHI750E using NF ( $2 \times 3 \text{ cm}^2$ ), CP ( $2 \times 3 \text{ cm}^2$ ) and saturated calomel electrode (SCE) as working, counter and reference electrodes. The electrodeposition was performed in an aqueous solution with 10 mM  $\text{Fe}(\text{NO}_3)_3 \cdot 9\text{H}_2\text{O}$  and 0.89 g alanine at room temperature with  $-1.2 \text{ V}$  for 600 s. The loading of FeOOH/NF catalyst is  $2.0 \text{ mg cm}^{-2}$ .

**Preparation of the FeOOH/Co/NF and FeOOH/S-Co/NF.** To obtain the FeOOH/Co/NF, the Co/NF was immersed into 15 mL solution with 100 mM  $\text{FeSO}_4 \cdot 9\text{H}_2\text{O}$  for 15 min at room temperature and the adsorbed  $\text{Fe}^{2+}$  ions were oxidized to FeOOH during this process, then washed and dried in the air. The loading

of FeOOH/Co/NF is  $15.7 \text{ mg cm}^{-2}$ . The FeOOH/S-Co/NF catalyst was obtained with the similar process and the only difference is that 1 M thiourea (TU) was added into the electrolyte when preparing the Co/NF, which is named S-Co/NF. The loading of FeOOH/S-Co/NF catalyst is  $18.5 \text{ mg cm}^{-2}$ . During this process, the possible reactions are as follows. First,  $\text{Co}^{2+}$  or the complex ions of  $\text{Co}(\text{TU})_2^{2+}$  was reduced into metallic Co at 3.5 V. The dissociative TU can adsorb on the generated metallic Co and subsequently be reduced at 3.5 V to form S-Co. When S-Co was immersed into  $\text{FeSO}_4$  solution, the adsorbed  $\text{Fe}^{2+}$  was oxidized by the dissolved oxygen in the solution to form FeOOH/S-Co.

Additionally, the FeOOH/S-Co catalyst was also prepared on carbon paper (FeOOH/S-Co/CP) in the same conditions with FeOOH/S-Co/NF. The loading of FeOOH/S-Co/CP is  $18.2 \text{ mg cm}^{-2}$ , which is similar to that of FeOOH/S-Co/NF.

**Preparation of the Pt/C/NF and  $\text{RuO}_2$ /C/NF.** Electrode ink was obtained by adding 20% Pt/C (5 mg) into 720  $\mu\text{L}$  deionized water, 250  $\mu\text{L}$  isopropanol and 30  $\mu\text{L}$  Nafion for 30 min after ultrasonic dispersion. The  $\text{RuO}_2$  electrode ink was prepared in the same method, except that 5 mg Pt/C was replaced with 2 mg  $\text{RuO}_2$  and 3 mg carbon black. 50  $\mu\text{L}$  ink was dropped on NF ( $1 \text{ cm} \times 1 \text{ cm}$ ) to serve as Pt/C/NF or  $\text{RuO}_2$ /C/NF.

**Characterizations.** The structure and morphology of all the samples were performed through scanning electron microscopy (SEM, JSM-7100F) and transmission electron microscopy (TEM, FEI Tecnai G2 F20). The X-ray power diffraction patterns (XRD) of FeOOH/S-Co, FeOOH/Co, FeOOH and Co catalysts

were performed on Bruker D8 Discover and their X-ray photoelectron spectroscopy (XPS) were collected on ESCALAB 250Xi. The Raman spectra of FeOOH/S-Co and FeOOH/Co samples were carried out on LabRAM HR Evolution at 532 nm excitation.

The electrochemical in-situ Raman measurements were also obtained on LabRAM HR Evolution with an excitation source of 532 nm. A specially designed cell was used for in-situ Raman tests, in which Pt wire, Ag/AgCl electrode and FeOOH/S-Co/NF (1 cm × 1 cm) serve as counter electrode, reference electrode and working electrode, respectively. The Raman spectra were recording after applying various potentials for 3 min.

**Electrochemical measurements.** Electrochemical measurements were conducted using CHI750E in a three-electrode system containing working electrode (NF loaded with prepared catalysts), reference electrode (saturated calomel electrode, SCE) and counter electrode (graphite rod). All potentials were converted to reversible hydrogen electrode (RHE):  $E_{RHE} = E_{SCE} + 0.244 + 0.059 \times pH$ . Linear sweep voltammetry (LSV) was recorded at a scan rate of 5 mV s<sup>-1</sup> with 95% iR compensation, unless otherwise stated. To eliminate the influence of oxidation peak of NF, the LSV curves of all catalysts for OER were obtained via a negative scan. Electrochemical impedance spectroscopy (EIS) was carried out at frequency between 1000 kHz and 0.1 Hz. The double layer capacitance ( $C_{dl}$ ) was estimated via cyclic voltammetry (CV) at scan rates from 5 to 30 mV s<sup>-1</sup> in a non-Faradaic potential window. The Faradaic

efficiency (FE) was calculated by the formula:  $FE = \frac{V_a}{V_t} \times 100\%$  ( $V_a$ : actual measured

gas volumes;  $V_t$ : theoretical gas volumes.) and  $V_t = (I \times t)/(n \times F) \times V_m$  ( $I$ : current, mA;  $t$ : time, s;  $n$ : transferred electron number;  $F$ : Faradaic constant, 96485 C mol<sup>-1</sup>;  $V_m$ : gas molar volume, 22.4 L mol<sup>-1</sup>). In addition, the turnover frequency (TOF) was calculated according to the equation:  $TOF = (j \times S)/(n \times F \times N)$ , in which all metal atoms were considered as the active sites. ( $j$ : current density, mA cm<sup>-2</sup>;  $S$ : geometric area of electrode, cm<sup>2</sup>;  $n$ : transferred electron number;  $F$ : Faradaic constant, 96485 C mol<sup>-1</sup>;  $N$ : the number of active sites, mol).

**Computational Methods.** The spin-polarized density function theory (DFT) calculations were performed via the Vienna Ab-initio Simulation Package (VASP) with plane wave basis sets and projector-augmented wave (PAW) pseudopotentials.<sup>1-3</sup> The generalized gradient approximation (GGA) developed by Perdew–Burke–Ernzerhof (PBE) was adopted for the exchange-correlation functionals.<sup>4</sup> The converged cutoff energy for plane-wave basis set was 450 eV and the k-point mesh for Brillouin zone was set to be  $3 \times 3 \times 1$ . The convergence criterion for geometry optimization was set to be  $1 \times 10^{-5}$  eV for energy change and 0.05 eV/Å for structural optimization.

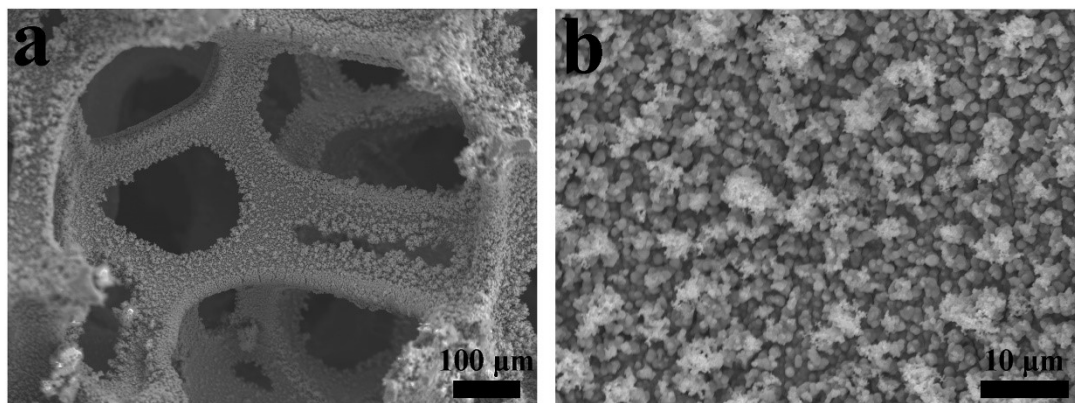

**Fig. S1** The SEM images of S-Co/NF catalyst at (a) low magnification, and (b) high magnification.

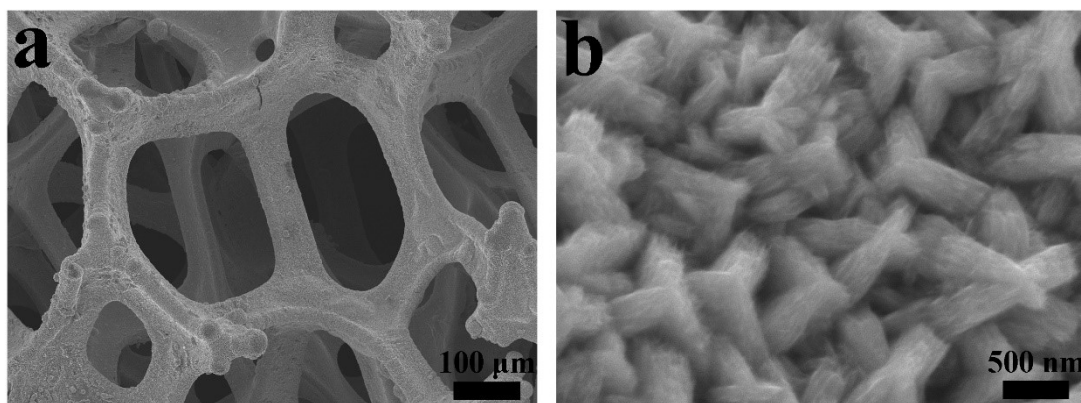

**Fig. S2** The SEM images of Co/NF sample at (a) low magnification, and (b) high magnification.

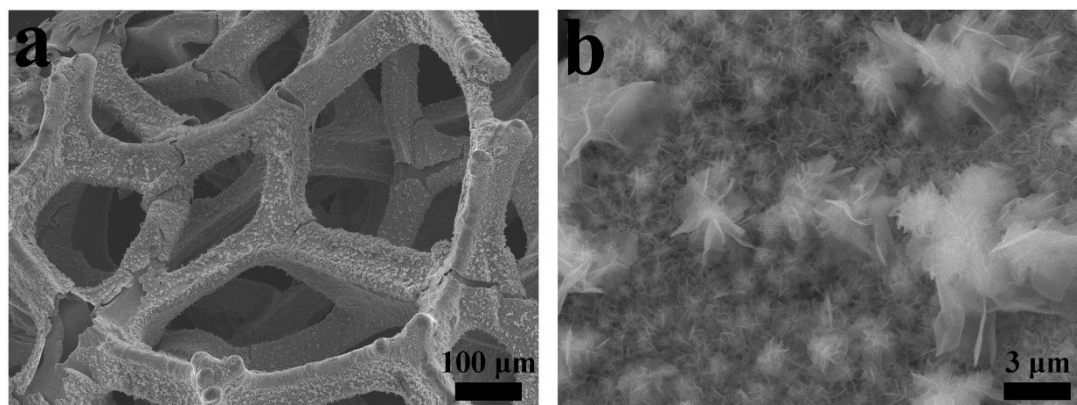

**Fig. S3** The SEM images of FeOOH/Co/NF catalyst at (a) low magnification, and (b) high magnification.

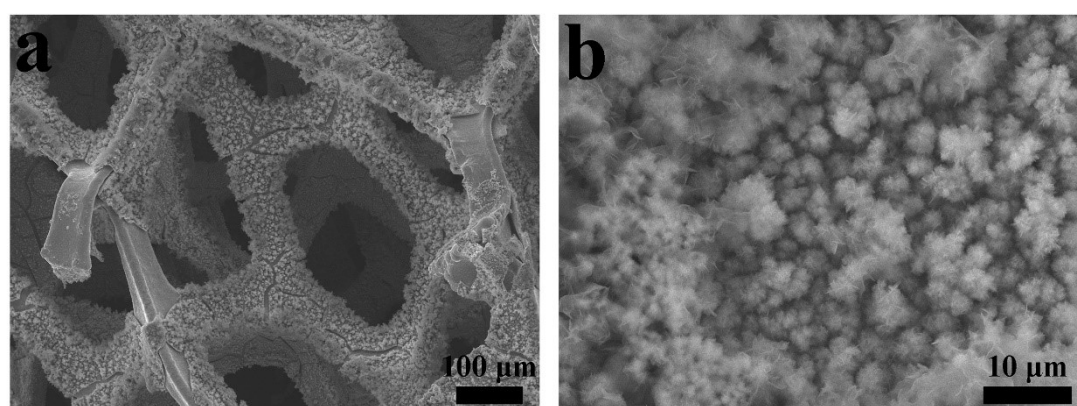

**Fig. S4** The SEM images of FeOOH/S-Co/NF catalyst at (a) low magnification, and (b) high magnification.

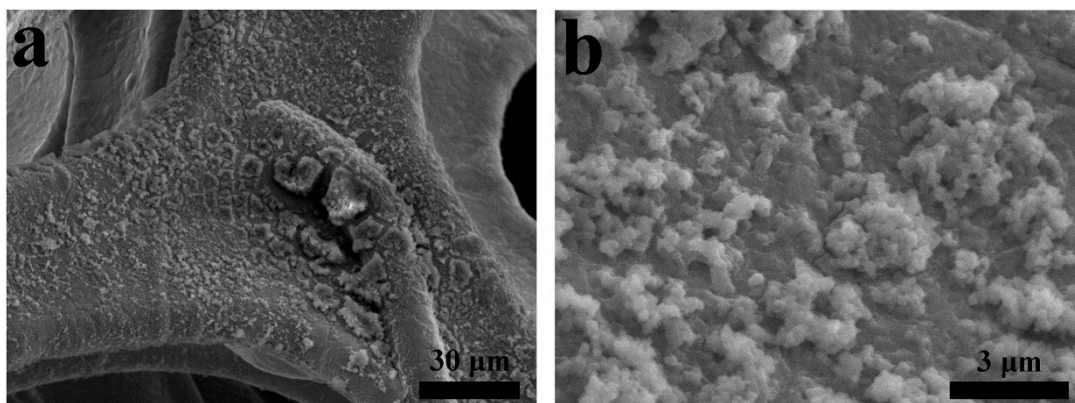

**Fig. S5** The SEM images of FeOOH/NF catalyst at (a) low magnification, and (b) high magnification.

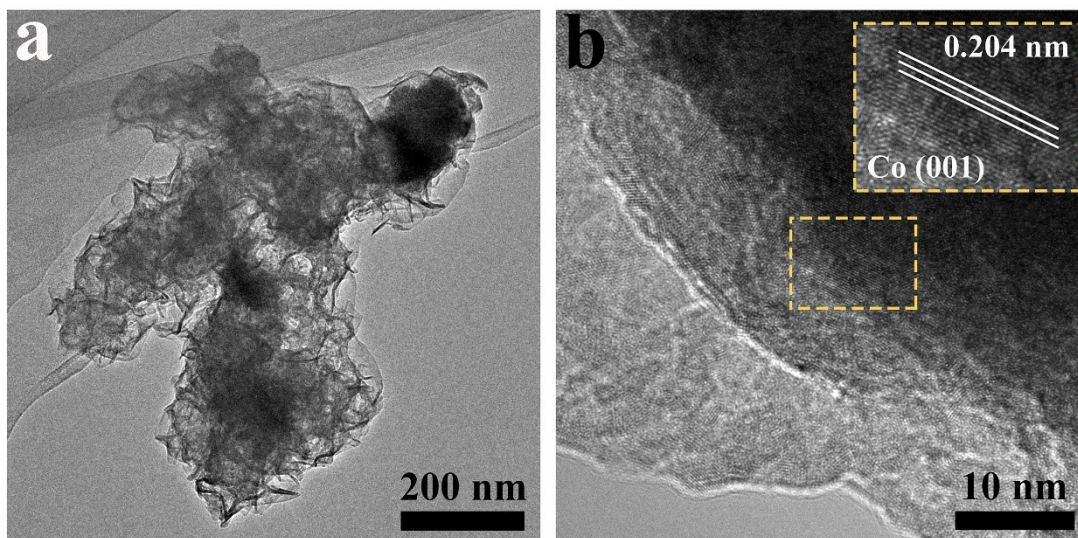

**Fig. S6** (a) TEM image, and (b) HRTEM image of Co sample.



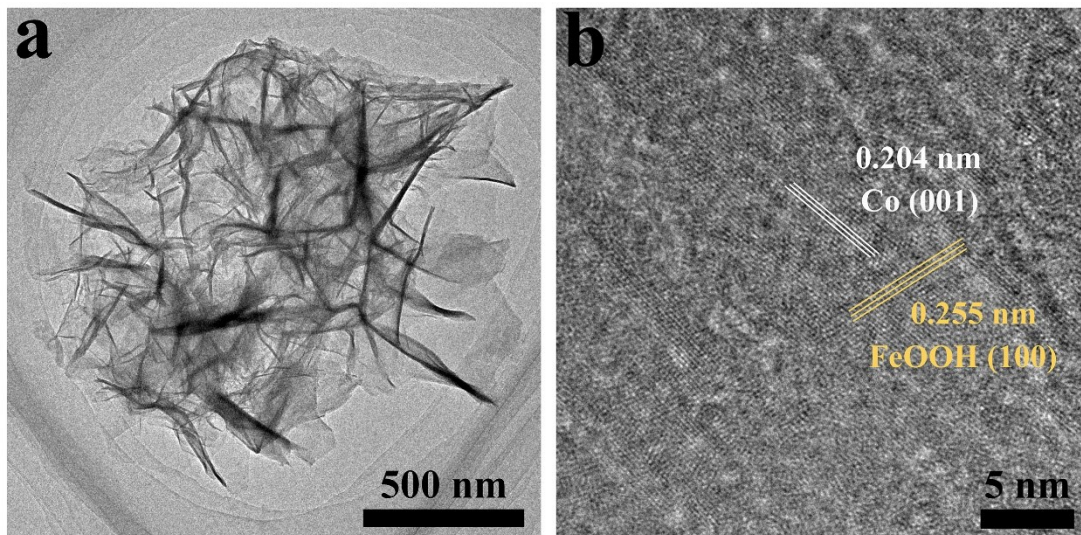

**Fig. S7** (a) TEM image, and (b) HRTEM image of FeOOH/Co catalyst.

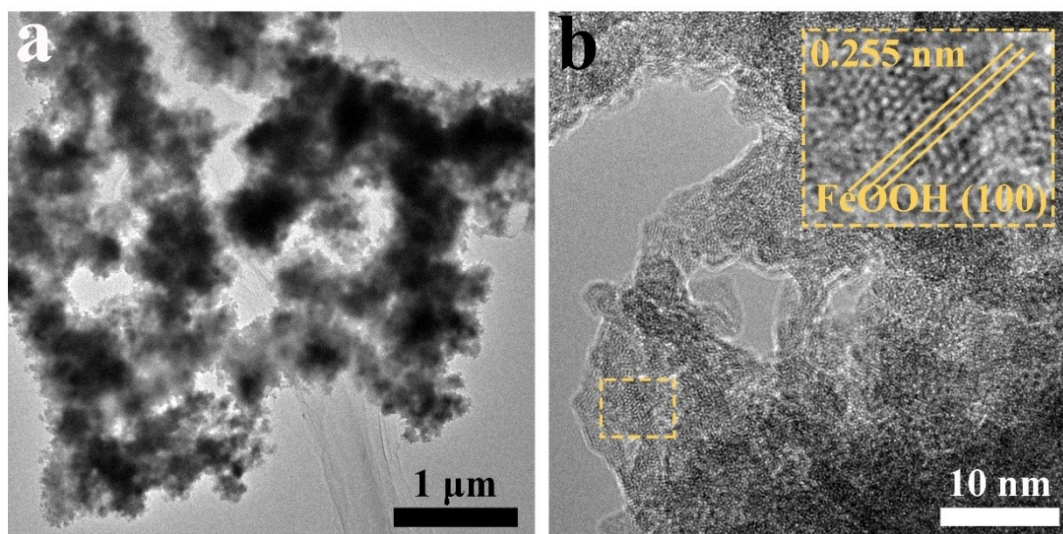

**Fig. S8** (a) TEM image, and (b) HRTEM image of FeOOH catalyst.

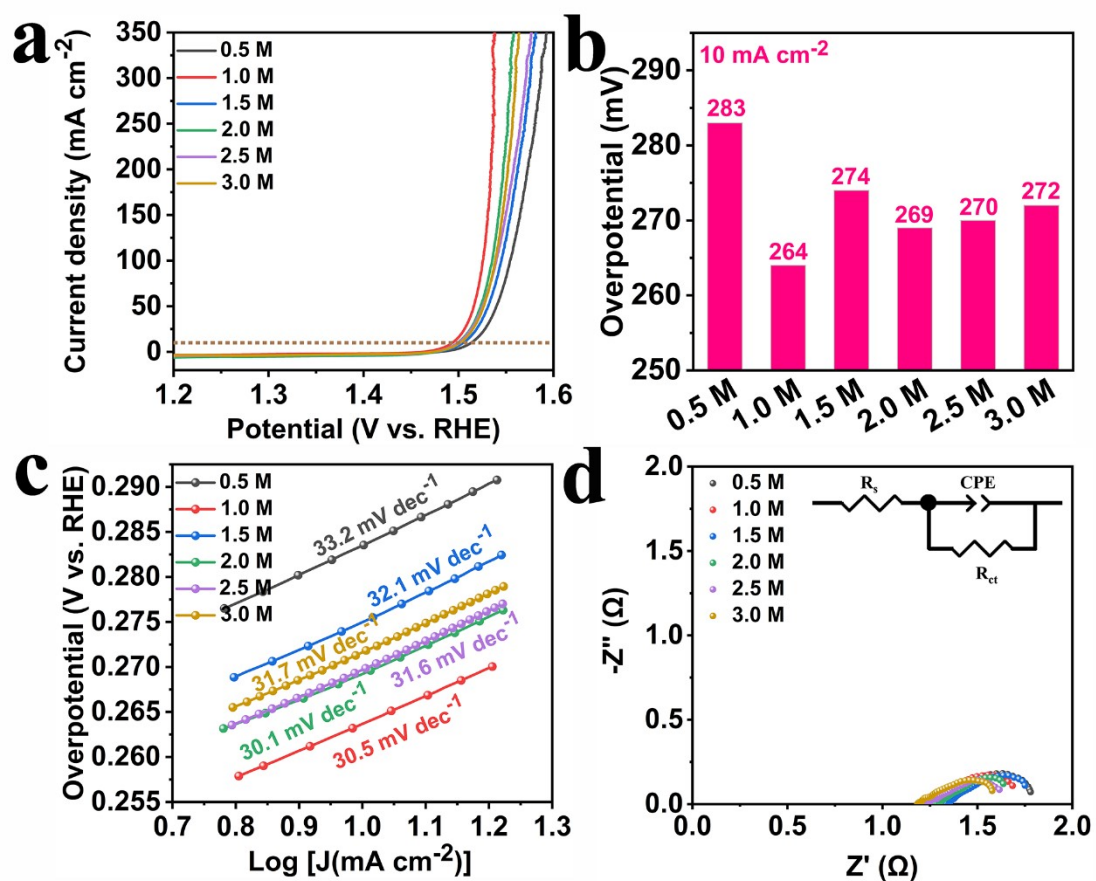

**Fig. S9** The OER performance in 1.0 M KOH for FeOOH/S-Co catalysts prepared with different thiourea concentrations. (a) Polarization curves with a scan rate of  $5 \text{ mV s}^{-1}$ , (b) corresponding comparison of overpotentials at  $10 \text{ mA cm}^{-2}$ , (c) Tafel plots, (d) EIS curves.

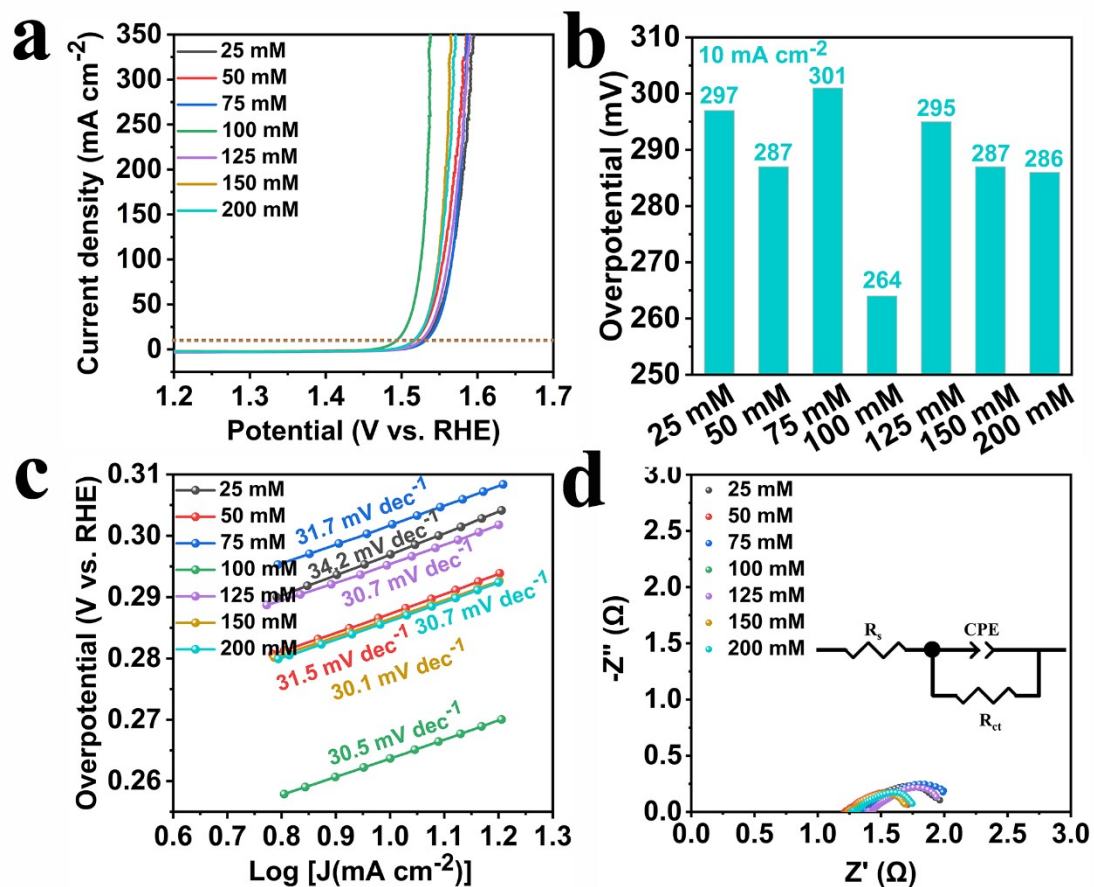

**Fig. S10** The OER performance in 1.0 M KOH for FeOOH/S-Co catalysts prepared with different  $\text{FeSO}_4$  concentrations. (a) Polarization curves with a scan rate of  $5 \text{ mV s}^{-1}$ , (b) corresponding comparison of overpotentials at  $10 \text{ mA cm}^{-2}$ , (c) Tafel plots, (d) EIS curves.

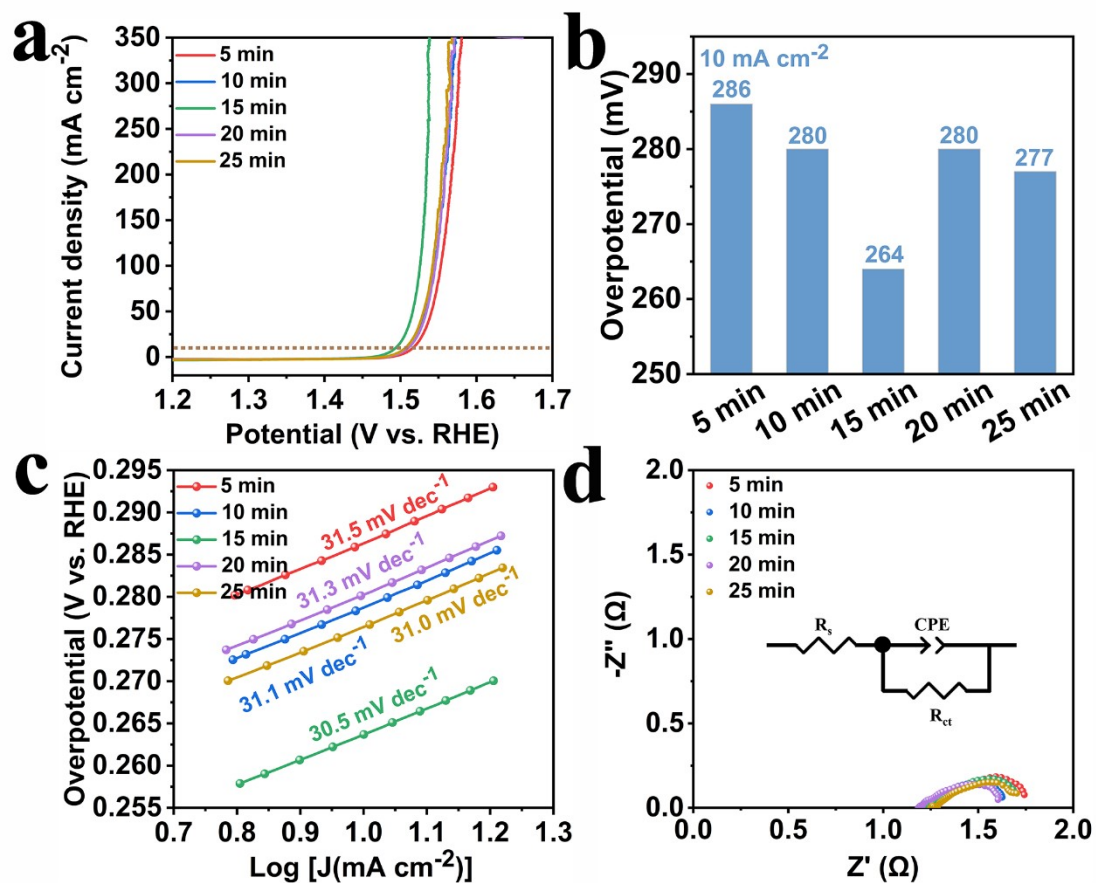

**Fig. S11** The OER performance in 1.0 M KOH for FeOOH/S-Co catalysts prepared with different soaking time in FeSO<sub>4</sub>. (a) Polarization curves with a scan rate of 5 mV s<sup>-1</sup>, (b) corresponding comparison of overpotentials at 10 mA cm<sup>-2</sup>, (c) Tafel plots, (d) EIS curves.



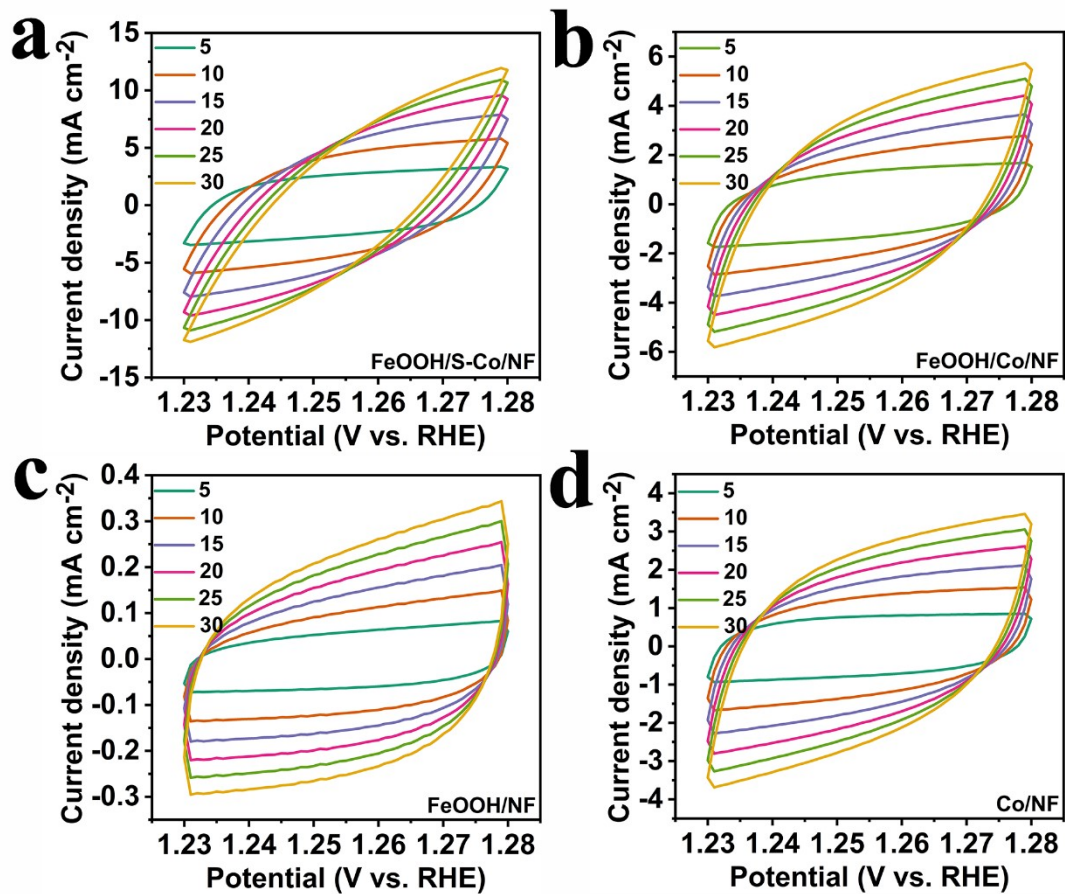

**Fig. S12** CV curves of (a) FeOOH/S-Co/NF, (b) FeOOH/Co/NF, (c) FeOOH/NF and (d) Co/NF catalyst recorded in O<sub>2</sub> saturated 1.0 M KOH solution with different scan rates.

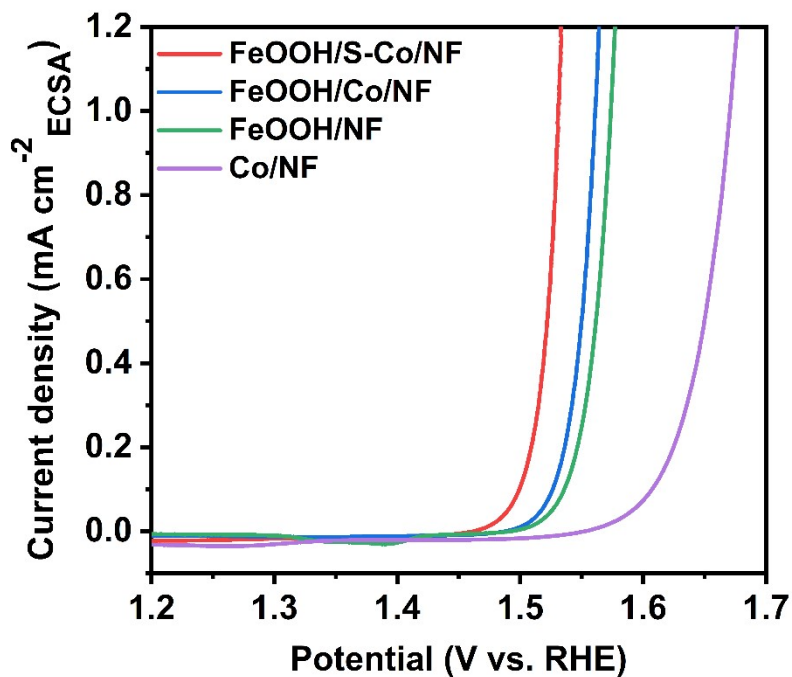

**Fig. S13** The OER polarization curves normalized by ECSA for FeOOH/S-Co/NF, FeOOH/Co/NF, FeOOH/NF and Co/NF catalysts.

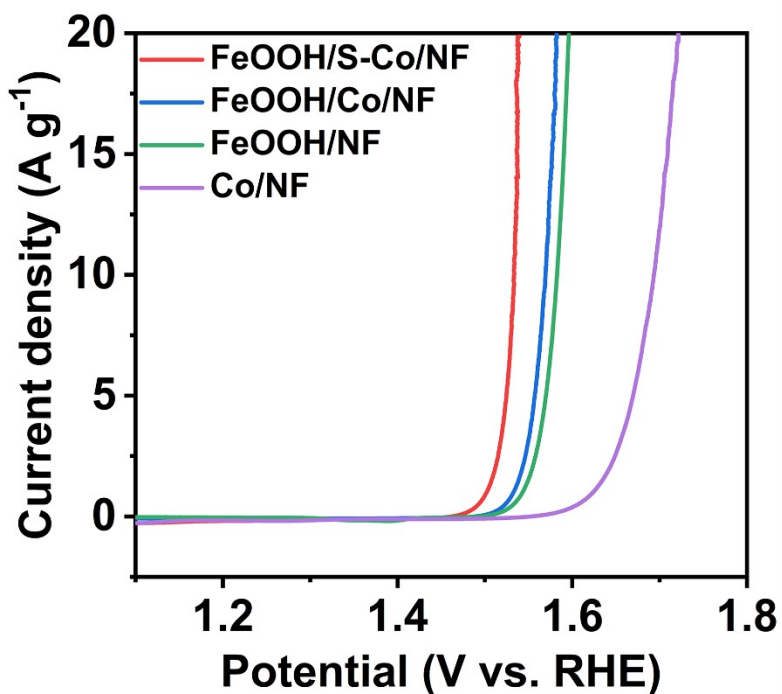

**Fig. S14** The OER polarization curves normalized by mass for FeOOH/S-Co/NF, FeOOH/Co/NF, FeOOH/NF and Co/NF catalysts.

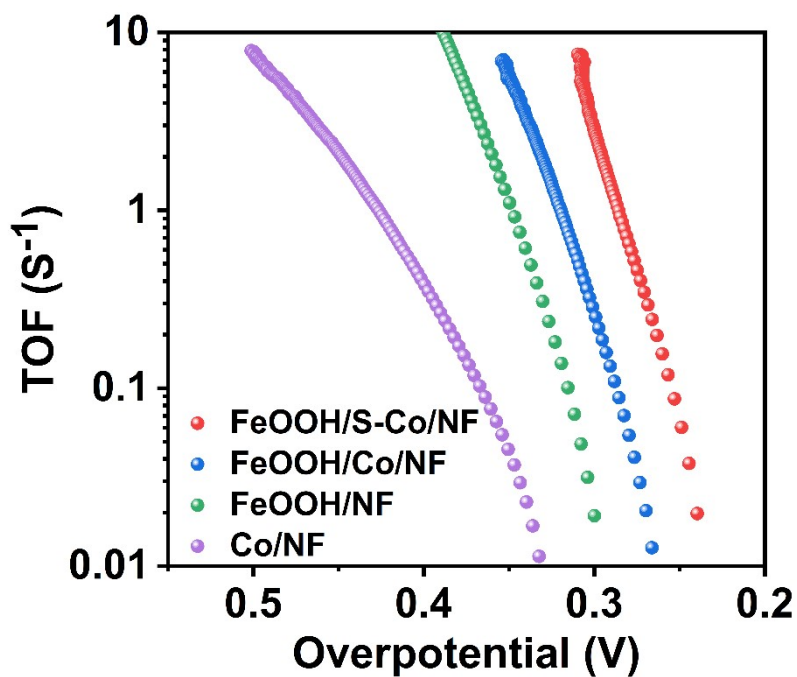

**Fig. S15** The TOF values of FeOOH/S-Co/NF, FeOOH/Co/NF, FeOOH/NF and Co/NF catalysts for OER.

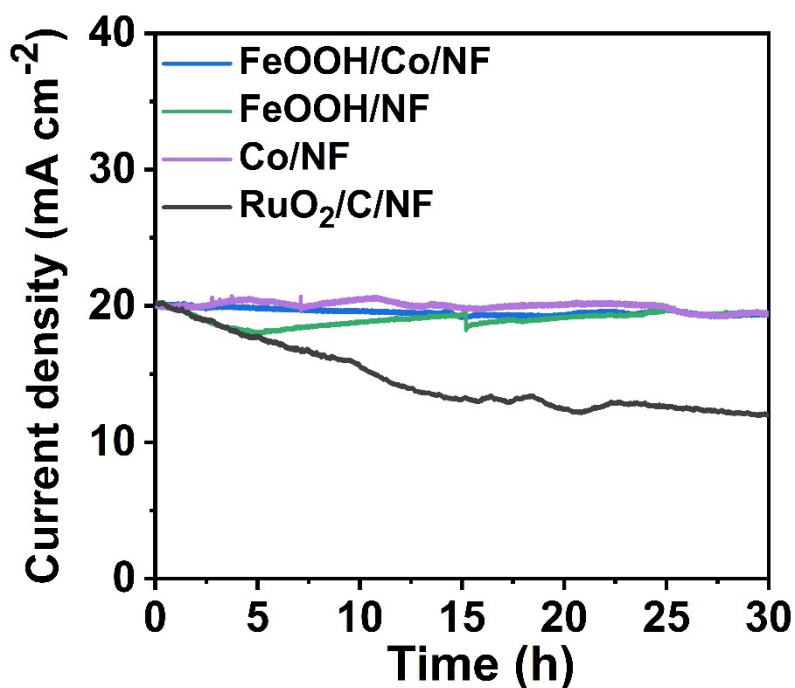

**Fig. S16** I-t curves of FeOOH/Co/NF, FeOOH/NF, Co/NF and RuO<sub>2</sub>/C/NF catalysts at 1.567 V, 1.606 V, 1.666 V and 1.660 V for 30 h.

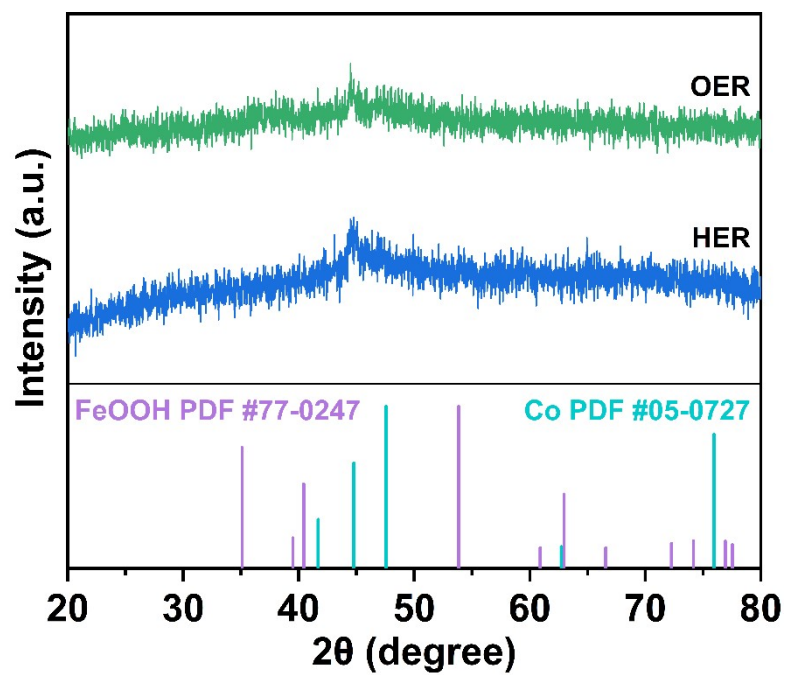

**Fig. S17** XRD patterns of the FeOOH/S-Co/NF catalyst after HER and OER i-t test at  $20 \text{ mA cm}^{-2}$  for 30 h.

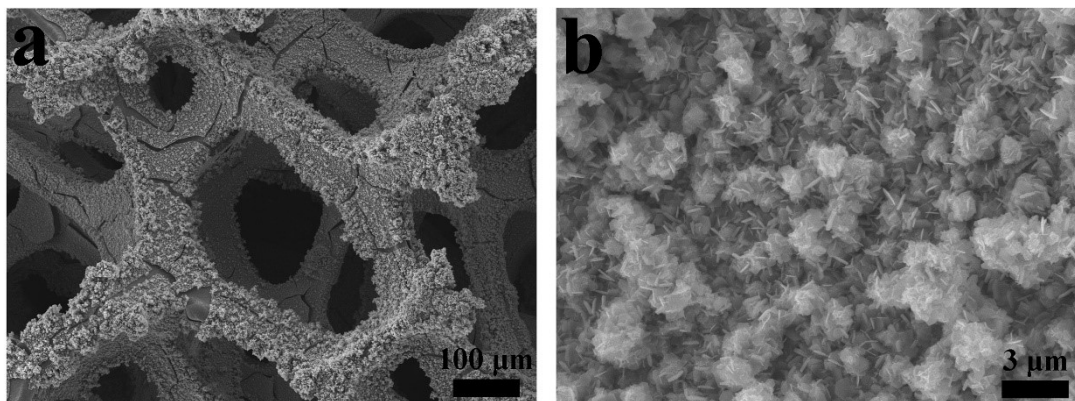

**Fig. S18** The SEM images of FeOOH/S-Co/NF catalyst after OER i-t test at  $20 \text{ mA cm}^{-2}$  for 30 h.



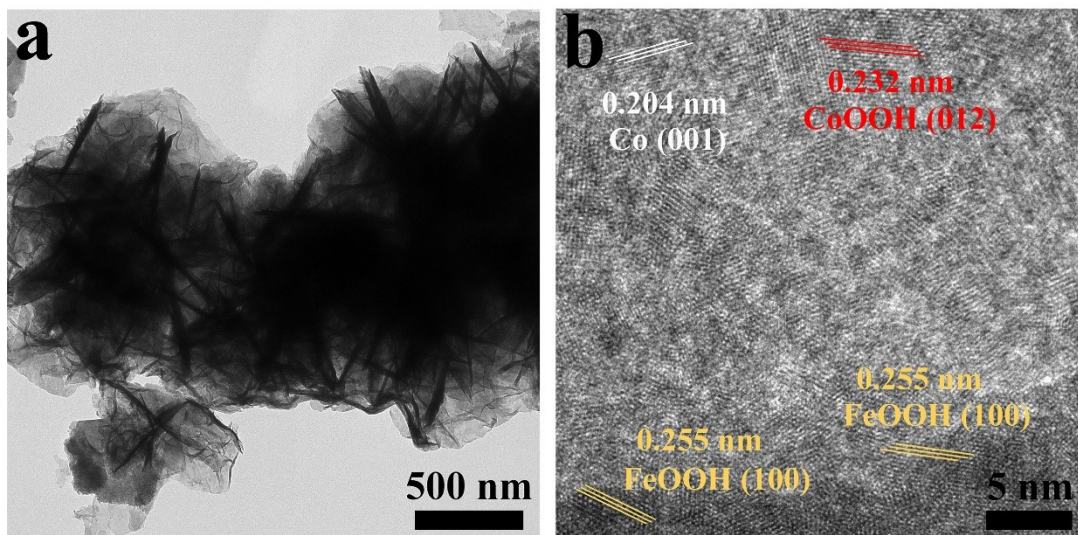

**Fig. S19** (a) TEM and (b) HRTEM images of FeOOH/S-Co/NF catalyst after OER i-t test at  $20 \text{ mA cm}^{-2}$  for 30 h.

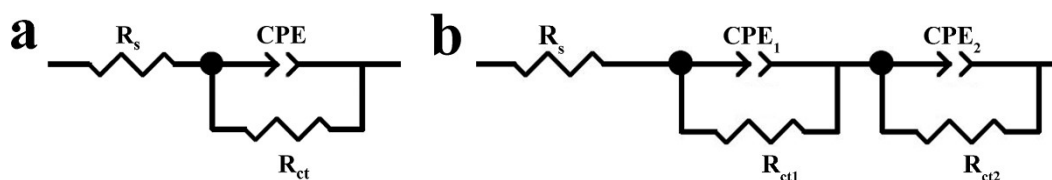

**Fig. S20** Equivalent circuit of (a) FeOOH/S-Co/NF, FeOOH/NF, Co/NF catalysts, and (b) Pt/C/NF for HER.

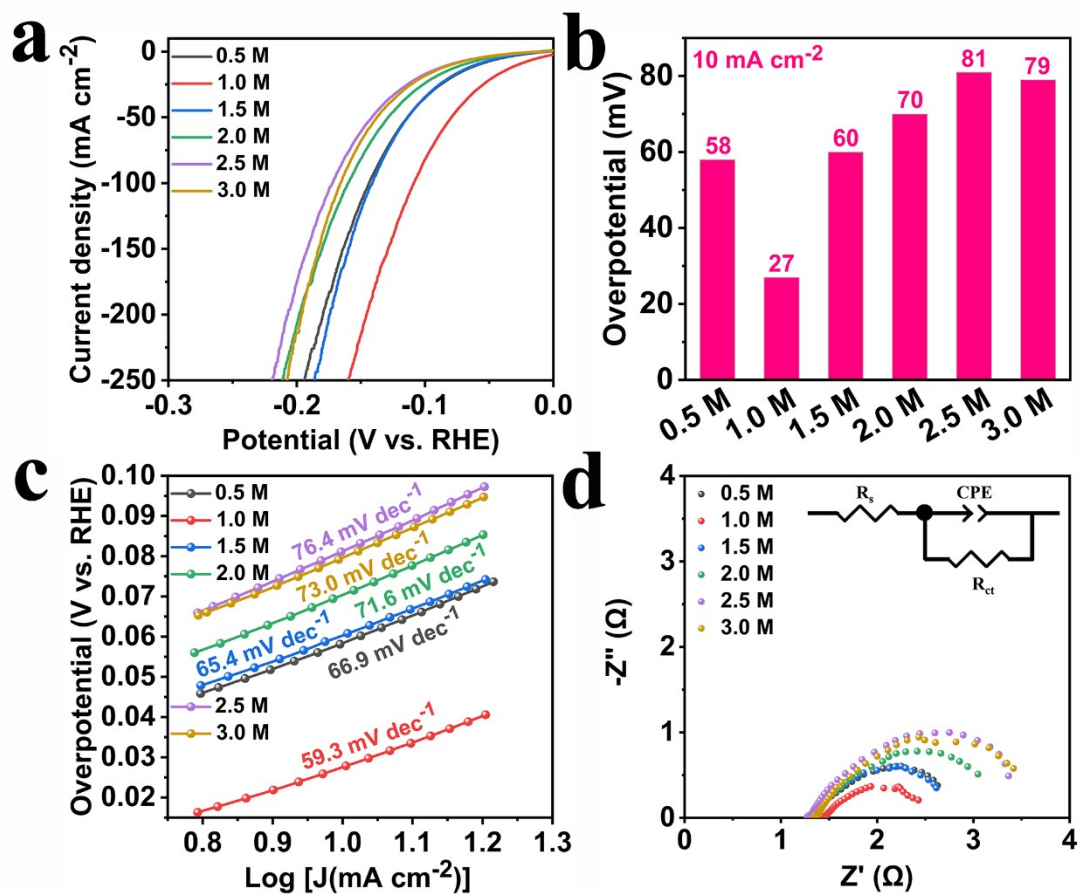

**Fig. S21** The HER performance in 1.0 M KOH for FeOOH/S-Co catalysts prepared with different thiourea concentrations. (a) Polarization curves with a scan rate of 5 mV s<sup>-1</sup>, (b) corresponding comparison of overpotentials at 10 mA cm<sup>-2</sup>, (c) Tafel plots, (d) EIS curves.

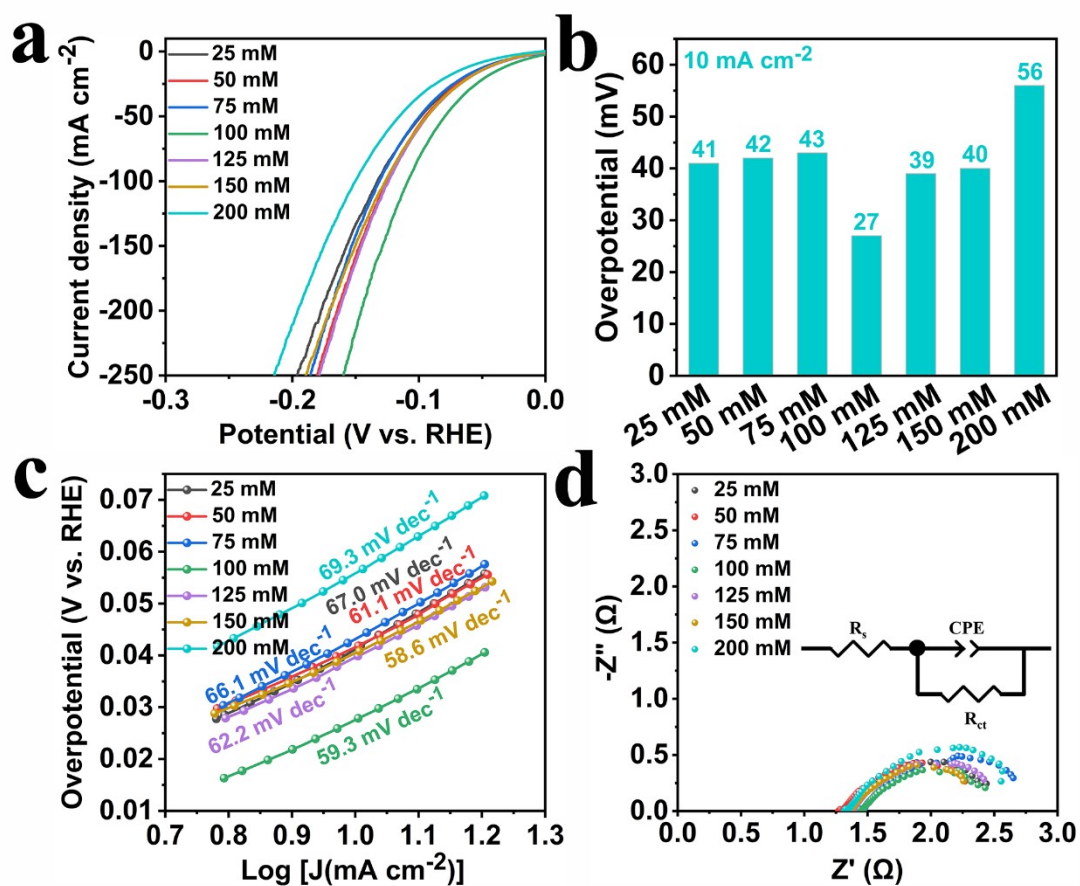

**Fig. S22** The HER performance in 1.0 M KOH for FeOOH/S-Co catalysts prepared with different FeSO<sub>4</sub> concentrations. (a) Polarization curves with a scan rate of 5 mV s<sup>-1</sup>, (b) corresponding comparison of overpotentials at 10 mA cm<sup>-2</sup>, (c) Tafel plots, (d) EIS curves.

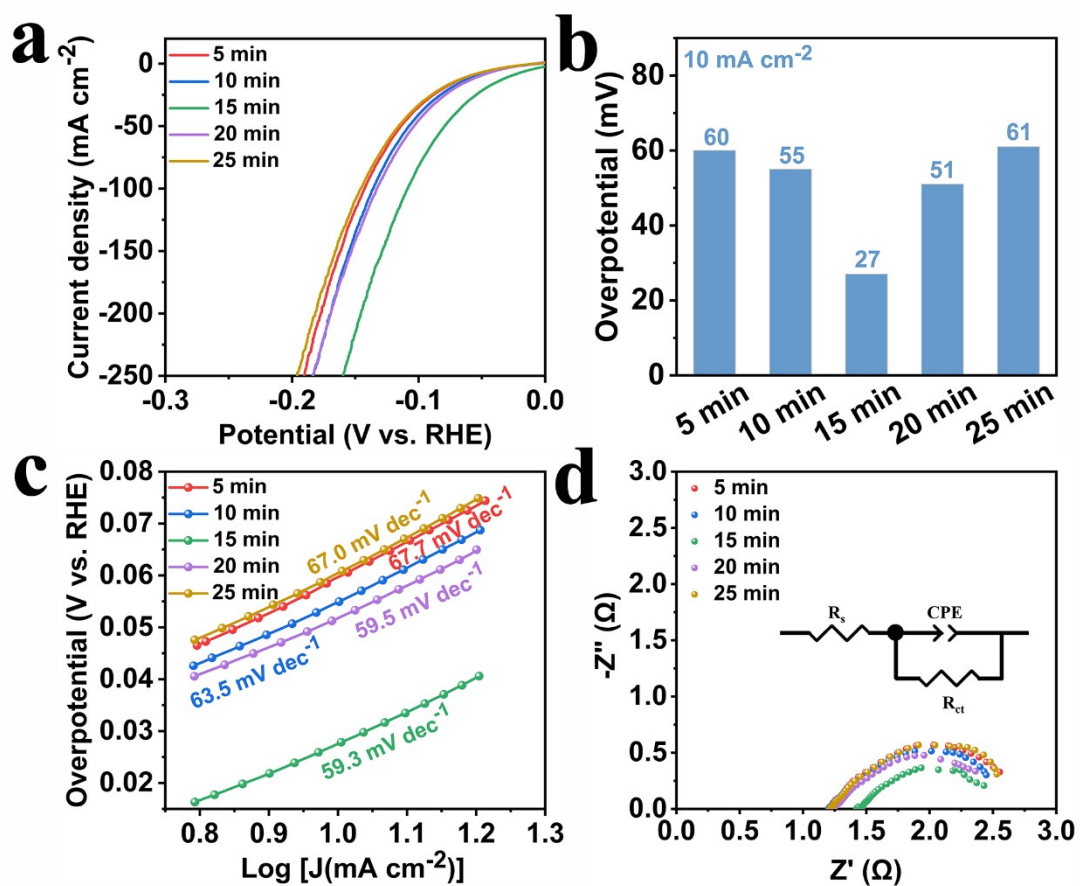

**Fig. S23** The HER performance in 1.0 M KOH for FeOOH/S-Co catalysts prepared with different soaking time in FeSO<sub>4</sub>. (a) Polarization curves with a scan rate of 5 mV s<sup>-1</sup>, (b) corresponding comparison of overpotentials at 10 mA cm<sup>-2</sup>, (c) Tafel plots, (d) EIS curves.

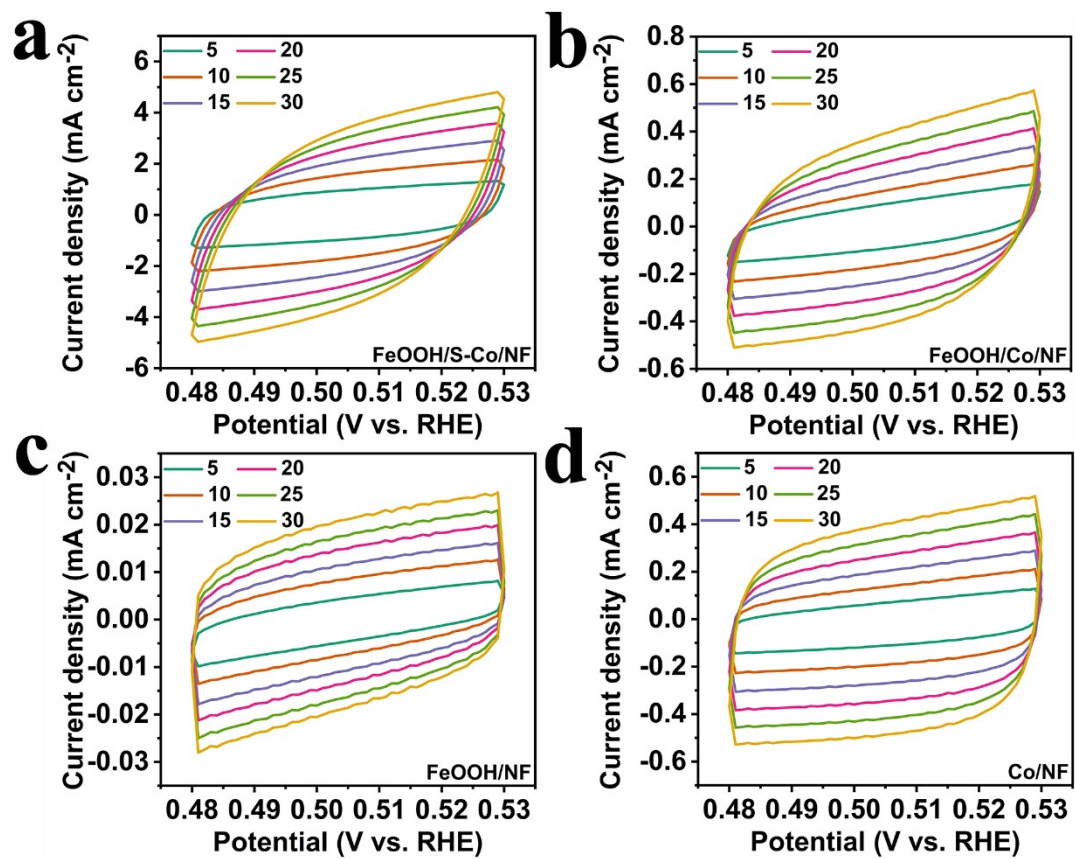

**Fig. S24** CV curves of (a) FeOOH/S-Co/NF, (b) FeOOH/Co/NF, (c) FeOOH/NF and (d) Co/NF catalysts recorded in  $N_2$ -saturated 1.0 M KOH solution with different scan rates.

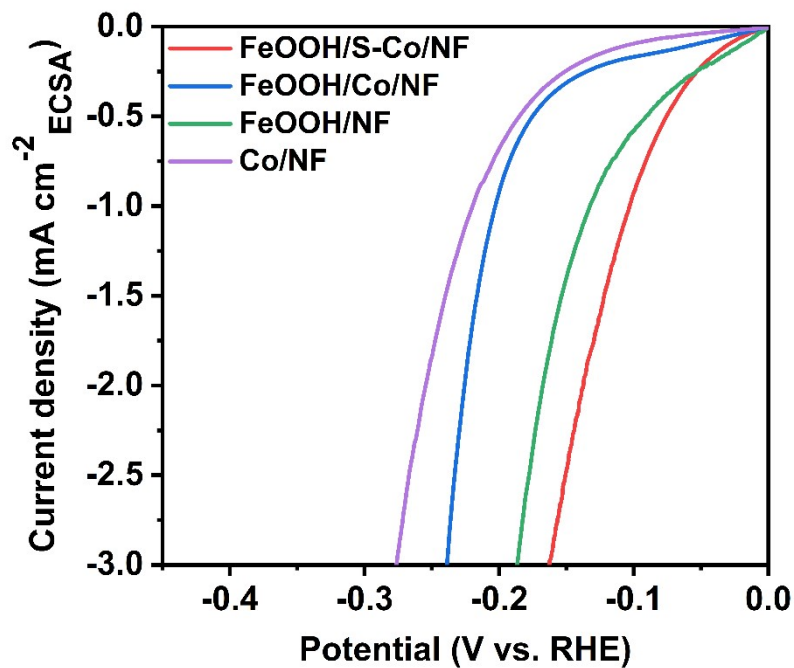

**Fig. S25** The HER polarization curves normalized by ECSA for FeOOH/S-Co/NF, FeOOH/Co/NF, FeOOH/NF and Co/NF catalysts.

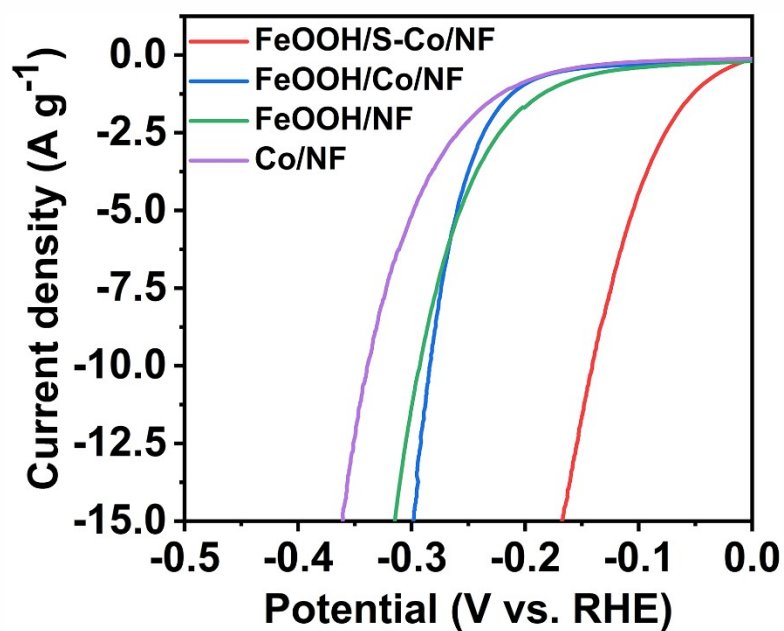

**Fig. S26** The HER polarization curves normalized by mass for FeOOH/S-Co/NF, FeOOH/Co/NF, FeOOH/NF and Co/NF catalysts.



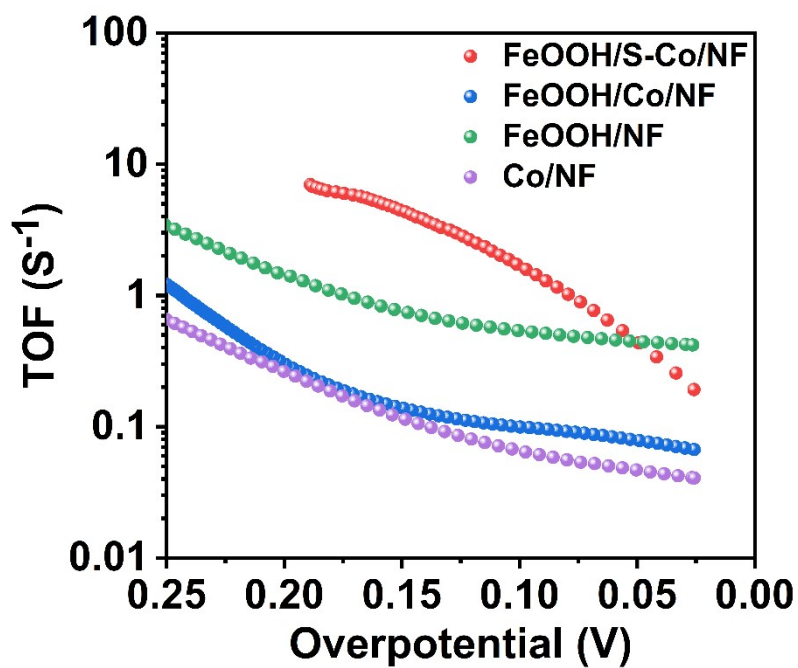

**Fig. S27** The TOF values of FeOOH/S-Co/NF, FeOOH/Co/NF, FeOOH/NF and Co/NF catalysts for HER.

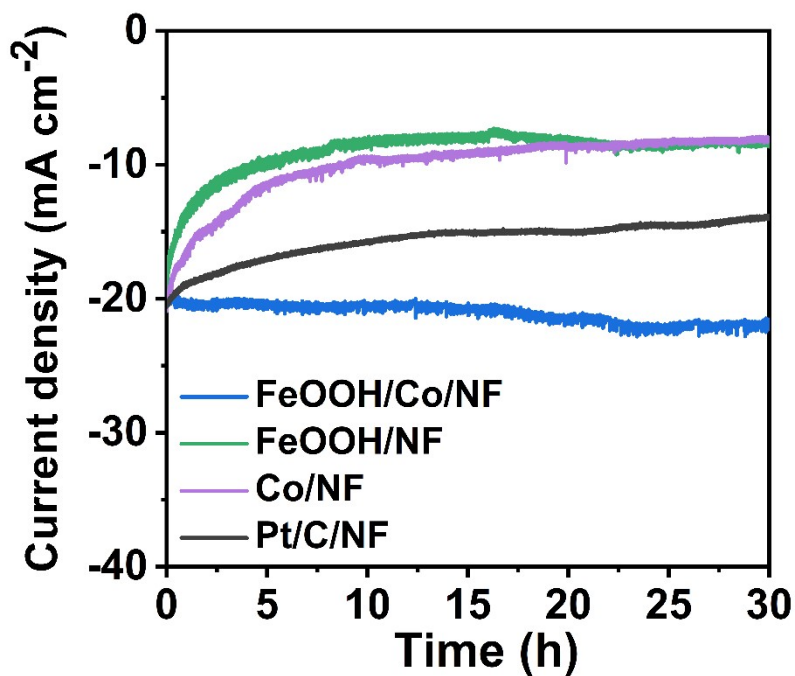

**Fig. S28** I-t curves of FeOOH/Co/NF, FeOOH/NF, Co/NF and Pt/C/NF catalysts at  $-0.243$  V,  $-0.298$  V,  $-0.252$  V and  $-0.086$  V for 30 h.

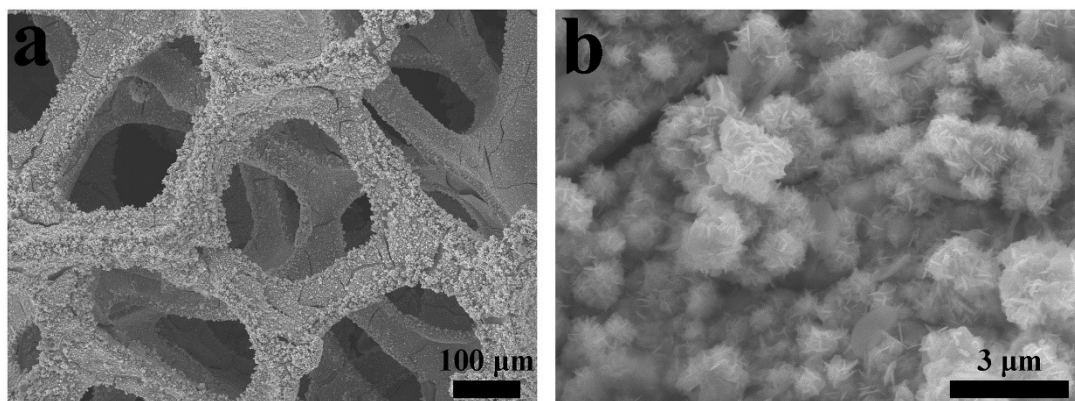

**Fig. S29** The SEM images of FeOOH/S-Co/NF catalyst after HER i-t test at 20 mA  $\text{cm}^{-2}$  for 30 h.

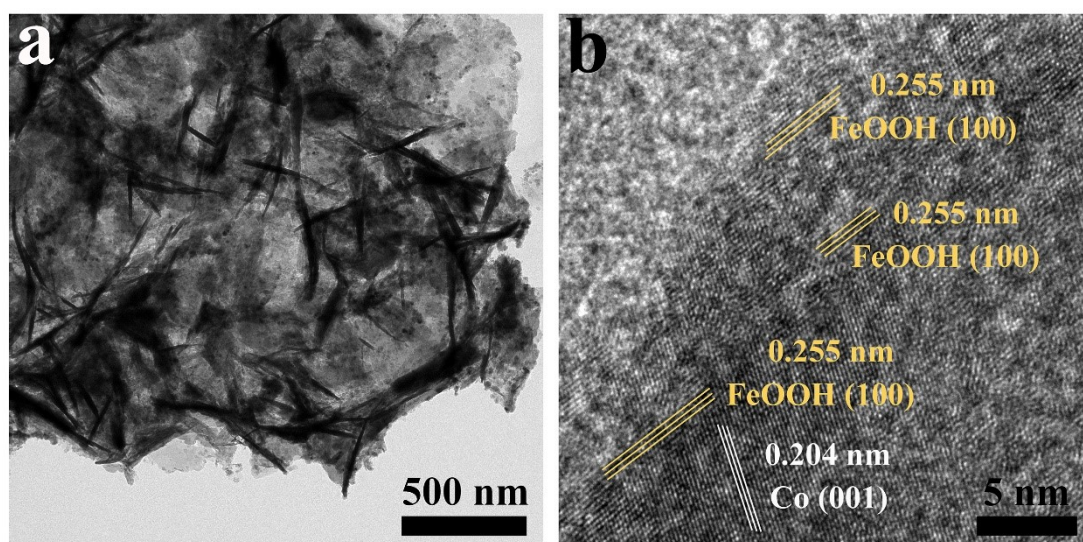

**Fig. S30** (a) TEM and (b) HRTEM images of FeOOH/S-Co/NF catalyst after HER i-t test at 20 mA  $\text{cm}^{-2}$  for 30 h.



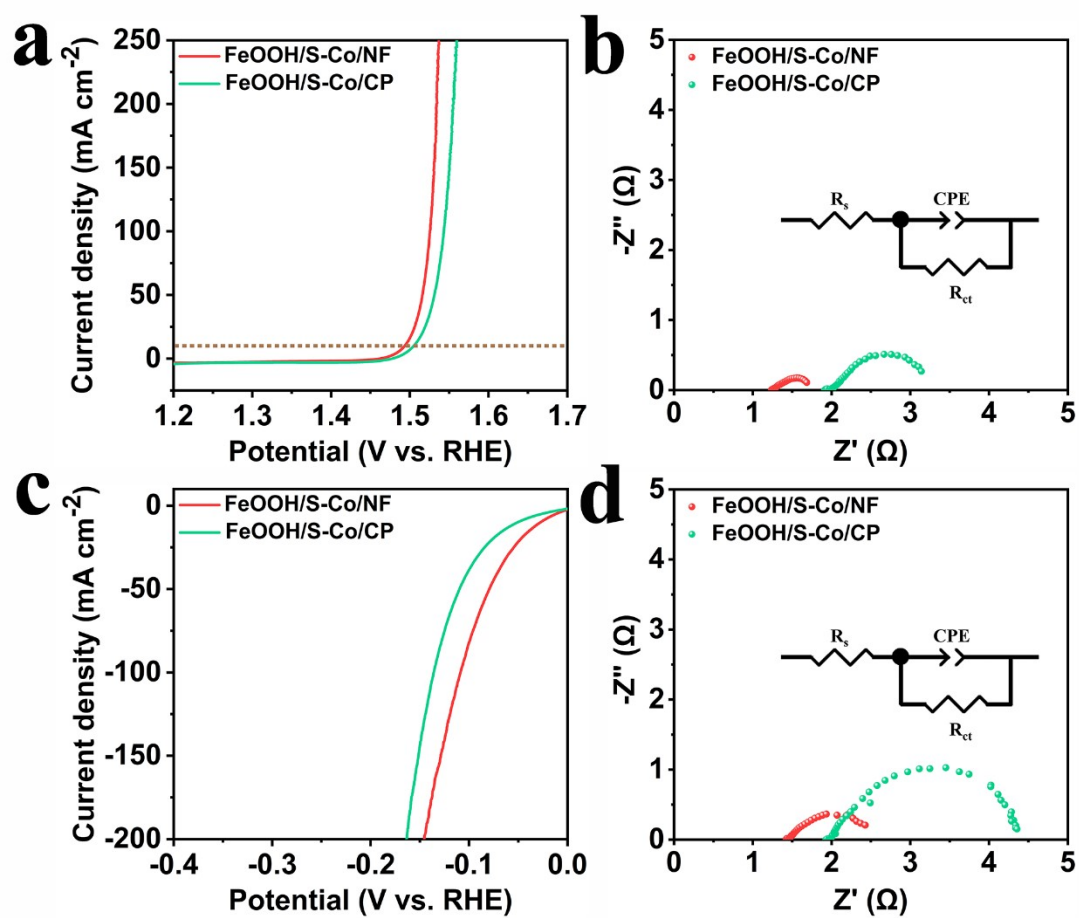

**Fig. S31** (a) LSV curves and (b) EIS curves of FeOOH/S-Co/NF and FeOOH/S-Co/CP for OER. (c) LSV curves and (d) EIS curves of FeOOH/S-Co/NF and FeOOH/S-Co/CP for HER.

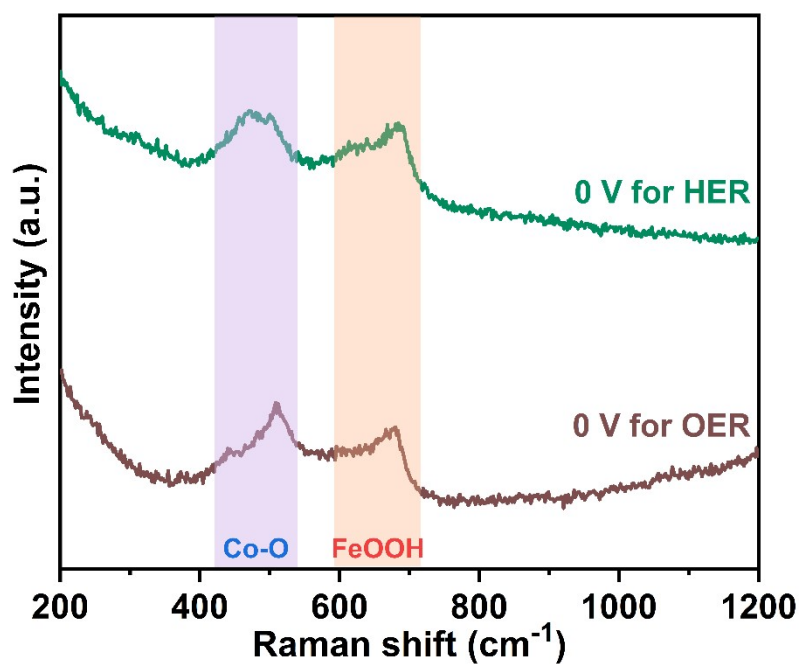

**Fig. S32** In-situ Raman spectra of the FeOOH/S-Co/NF at 0 V for OER and HER in the same scale.

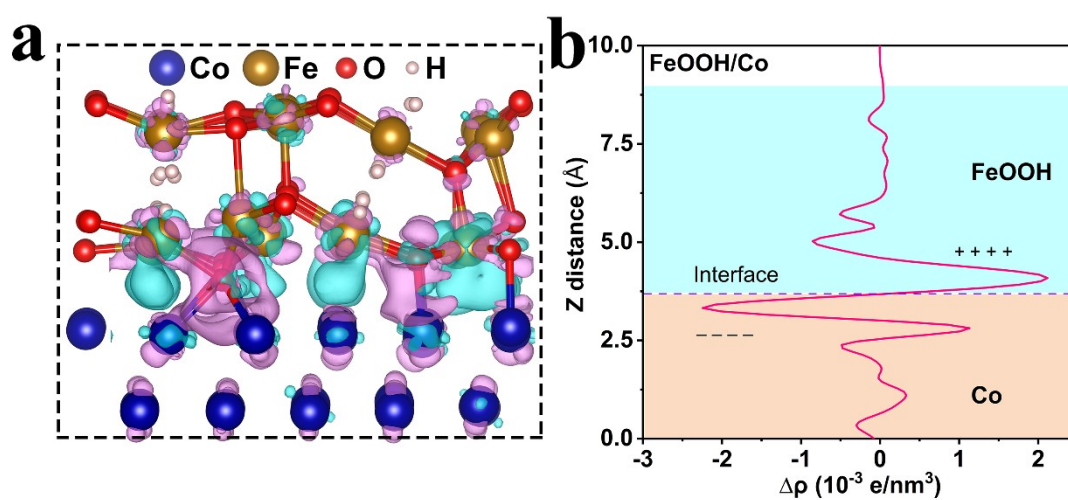

**Fig. S33** (a) The differential charge density and (b) planar-averaged electron density difference of FeOOH/Co. The cyan region represents charge depletion and pink represents charge accumulation.

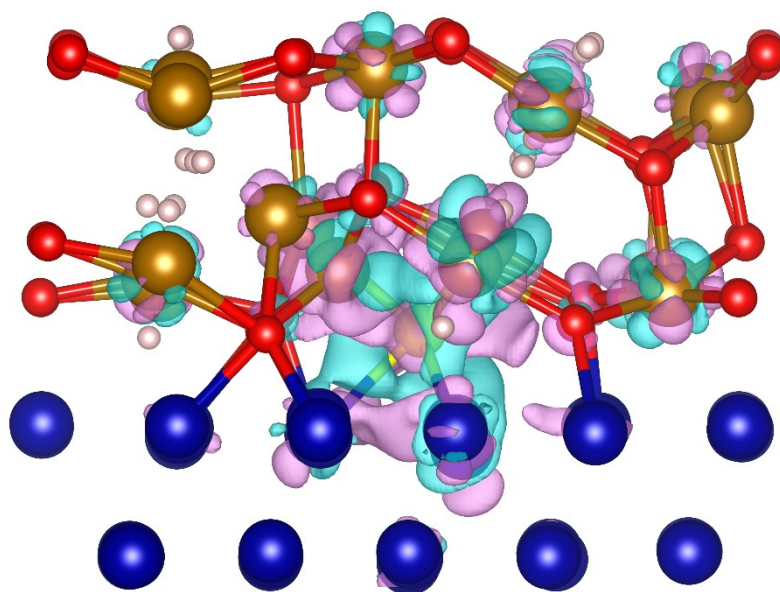

**Fig. S34** Differential charge density of FeOOH/S-Co which is calculated through regarding Co and FeOOH as a whole. The cyan region represents charge depletion and pink represents charge accumulation.

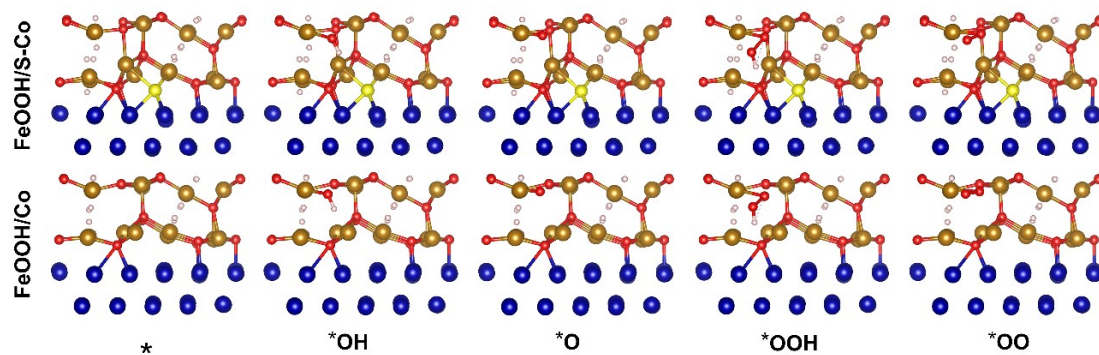

**Fig. S35** Structures of the reaction intermediates through the OER process on FeOOH/S-Co (top) and FeOOH/Co (down) surfaces. Color code: blue, Co; brown, Fe; yellow, S; red, O; white, H.

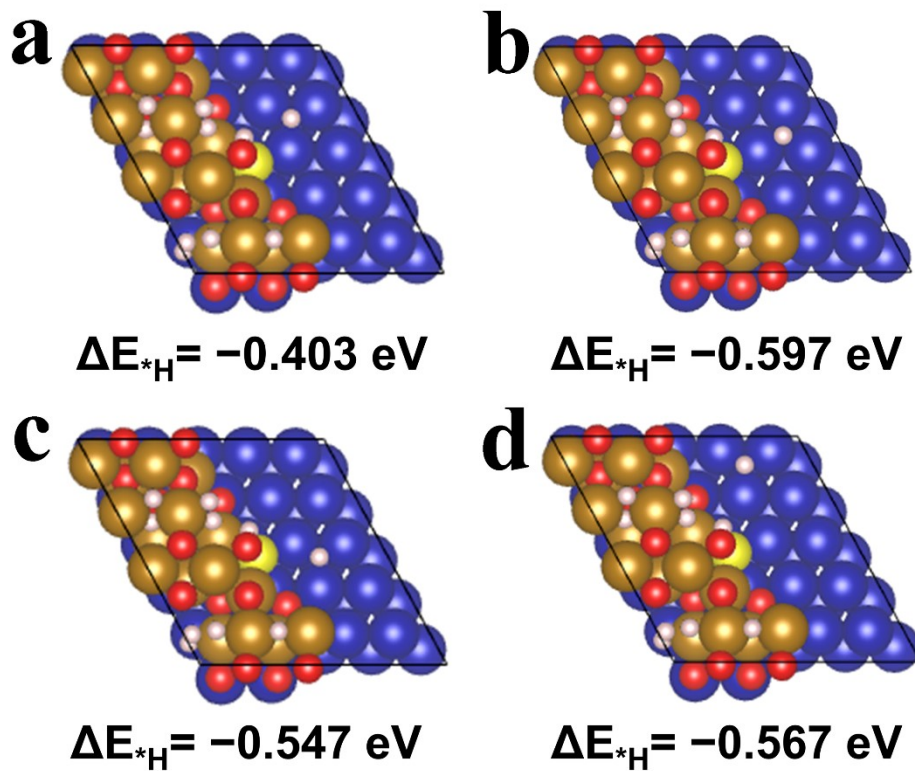

**Fig. S36** Structures of the  $*H$  adsorption at different hollow sites of FeOOH/S-Co.

Color code: blue, Co; brown, Fe; yellow, S; red, O; white, H.

**Table S1.** Elemental contents of different catalysts obtained from SEM-EDS measurement.

| Catalysts                  | Co<br>(At%/W%) | Fe<br>(At%/W%) | S<br>(At%/W%) | O<br>(At%/W%) |
|----------------------------|----------------|----------------|---------------|---------------|
| FeOOH/S-Co/NF              | 46.74/68.85    | 7.99/11.15     | 4.71/3.77     | 40.56/16.22   |
| FeOOH/Co/NF                | 76.20/88.71    | 4.78/5.28      | /             | 19.02/6.01    |
| FeOOH/NF                   | /              | 29.64/59.52    | /             | 70.36/40.48   |
| Co/NF                      | 98.02/99.45    | /              | /             | 1.98/0.55     |
| FeOOH/S-Co/NF<br>after OER | 49.65/70.96    | 7.98/10.81     | 4.57/3.56     | 37.79/14.66   |
| FeOOH/S-Co/NF<br>after HER | 66.69/81.79    | 6.11/7.11      | 6.12/4.08     | 21.07/7.02    |

**Table S2.** EIS fitting results of FeOOH/S-Co/NF, FeOOH/Co/NF, FeOOH/NF, Co/NF, RuO<sub>2</sub>/C/NF and NF catalysts for OER.

| Catalysts              | Solution series resistances $R_s$<br>( $\Omega$ ) | Charge transfer resistance $R_{ct}$<br>( $\Omega$ ) |
|------------------------|---------------------------------------------------|-----------------------------------------------------|
| FeOOH/S-Co/NF          | 1.25                                              | 0.58                                                |
| FeOOH/Co/NF            | 1.30                                              | 0.76                                                |
| FeOOH/NF               | 1.37                                              | 16.52                                               |
| Co/NF                  | 1.37                                              | 10.50                                               |
| RuO <sub>2</sub> /C/NF | 1.43                                              | 4.19                                                |
| NF                     | 1.49                                              | 14.46                                               |

**Table S3.** Comparison of OER activity of FeOOH/S-Co/NF catalyst with reported Co/Fe-based electrocatalysts in 1.0 M KOH solution.

| Catalysts                                                 | J (mA cm <sup>-2</sup> ) | Overpotential (mV) | References                                |
|-----------------------------------------------------------|--------------------------|--------------------|-------------------------------------------|
| <b>FeOOH/S-Co/NF</b>                                      | <b>10</b>                | <b>264</b>         | <b>This work</b>                          |
|                                                           | <b>100</b>               | <b>294</b>         |                                           |
| Co/CoP@HOMC                                               | 10                       | 260                | Adv. Energy Mater. 2021, 2102134          |
| P-Co <sub>9</sub> S <sub>8</sub>                          | 10                       | 280                | Small 2019, 1904507                       |
| NiCo <sub>2</sub> O <sub>4</sub>                          | 10                       | 350                | J. Mater. Chem. A 2020, 8, 17691-17705    |
| Co <sub>0.43</sub> Ni <sub>0.57</sub> @C                  | 10                       | 296                | Int. J. Hydrogen Energy 2022, 47, 3699-   |
| CMN-500                                                   | 10                       | 290                | Adv. Energy Mater. 2022, 12, 2103247      |
| CoP/FeOOH                                                 | 10                       | 250                | Chem. Eng. J. 2022, 428, 131130           |
| Ni/Co <sub>3</sub> O <sub>4</sub>                         | 10                       | 311                | Nano-Micro Lett. 2022, 14, 148            |
| FeCoNC/SL                                                 | 10                       | 316                | Adv. Sci. 2023, 10, 2205889               |
| CoP/Co/C                                                  | 10                       | 320                | J. Colloid Interface Sci. 2022, 623, 808- |
| Co-THB/CP                                                 | 10                       | 263                | Small 2023, 2207720                       |
| Co/CoO@NC@CC                                              | 10                       | 284                | Chem. Eng. J. 2021, 414, 128804           |
| NP Au/CoN <sub>x</sub>                                    | 10                       | 310                | Adv. Mater. 2020, 32, 1907214.            |
| S-FeOOH/IF                                                | 10                       | 244                | Adv. Funct. Mater. 2022, 32, 2112674      |
| CoSe <sub>2</sub> /ZnSe                                   | 10                       | 320                | ACS Nano 2019, 13, 5635-5645              |
| Fe-NiO/NiS <sub>2</sub>                                   | 10                       | 270                | Angew. Chem. Int. Ed. 2022,61,            |
| FeOOH/Ni <sub>3</sub> N                                   | 10                       | 244                | Appl. Catal., B 2020, 269, 118600         |
| Mo-NiCo <sub>2</sub> O <sub>4</sub> /Co <sub>5.47</sub> N | 10                       | 330                | Small 2020, 16, 1906775                   |

**Table S4.** Comparison of HER activity of FeOOH/S-Co/NF catalyst with reported Co/Fe-based electrocatalysts in 1.0 M KOH solution.

| Catalysts                                                            | J (mA cm <sup>-2</sup> ) | Overpotential (mV) | References                                |
|----------------------------------------------------------------------|--------------------------|--------------------|-------------------------------------------|
| <b>FeOOH/S-Co/NF</b>                                                 | <b>10</b>                | <b>27</b>          | <b>This work</b>                          |
|                                                                      | <b>100</b>               | <b>100</b>         |                                           |
| Ni/FeOOH                                                             | 10                       | 38                 | Adv. Energy Mater. 2020, 10, 1904020      |
| MoO <sub>2</sub> /Co                                                 | 10                       | 48                 | J. Mater. Chem. A, 2022, 10, 17297-       |
| Co-doped CeO <sub>2</sub>                                            | 10                       | 46                 | J. Am. Chem. Soc. 2020, 142, 6461-6466.   |
| Co/MoN                                                               | 10                       | 52                 | Appl. Catal., B 2021, 286, 119882         |
| CoNiRuNT <sub>3</sub>                                                | 10                       | 52                 | Adv. Mater. 2022, 34, 2107488             |
| Pt@NiFe LDH                                                          | 10                       | 58                 | Small 2023, 2207044                       |
| FeP-CoP/NC                                                           | 10                       | 79                 | Nat. Commun. 2021, 12, 4143.              |
| Co-NC-AF                                                             | 10                       | 85                 | Adv. Mater. 2021, 33, 2103533             |
| FeP/Ni <sub>2</sub> P                                                | 10                       | 85                 | Nat. Commun. 2018, 9, 2551                |
| Ni/Co <sub>3</sub> O <sub>4</sub>                                    | 10                       | 93                 | Nano-Micro Lett. 2022, 14, 148            |
| Co/Mo <sub>2</sub> C@C                                               | 10                       | 98                 | Chem. Eng. J. 2022, 430, 132697           |
| δ-FeOOH/Ni <sub>3</sub> S <sub>2</sub> /NF                           | 10                       | 106                | J. Mater. Chem. A 2020 , 8 21199          |
| N-Co <sub>9</sub> S <sub>8</sub> /Ni <sub>3</sub> S <sub>2</sub> /NF | 10                       | 111                | Small 2023, 2207425                       |
| Co/CoP@HOMC                                                          | 10                       | 120                | Adv. Energy Mater. 2021, 2102134          |
| CoP/Co/C                                                             | 10                       | 132                | J. Colloid Interface Sci. 2022, 623, 808- |
| Co/CoO@NC@CC                                                         | 10                       | 152                | Chem. Eng. J. 2021, 414, 128804           |
| Fe <sub>0.4</sub> Co <sub>0.3</sub> Ni <sub>0.3</sub> -1.8           | 10                       | 175                | Energy Environ. Mater. 2023, 0, e12590    |



**Table S5.** EIS fitting results of FeOOH/S-Co/NF, FeOOH/Co/NF, FeOOH/NF, Co/NF, Pt/C/NF and NF catalysts for HER.

| Catalysts     | Solution series resistances $R_s$<br>( $\Omega$ ) | Charge transfer resistance $R_{ct}$<br>( $\Omega$ ) |
|---------------|---------------------------------------------------|-----------------------------------------------------|
| FeOOH/S-Co/NF | 1.45                                              | 1.09                                                |
| FeOOH/Co/NF   | 1.36                                              | 27.69                                               |
| FeOOH/NF      | 1.36                                              | 109.00                                              |
| Co/NF         | 1.33                                              | 35.33                                               |
| Pt/C/NF       | 1.54                                              | 0.96                                                |
| NF            | 1.42                                              | 64.71                                               |

**Table S6.** Comparison of water splitting performance of FeOOH/S-Co/NF catalyst with reported Co/Fe-based electrocatalysts in 1.0 M KOH solution.

| Catalysts                                                  | J (mA cm <sup>-2</sup> ) | Voltage (V)  | References                                      |
|------------------------------------------------------------|--------------------------|--------------|-------------------------------------------------|
| <b>FeOOH/S-Co/NF</b>                                       | <b>10</b>                | <b>1.576</b> | <b>This work</b>                                |
| Fe <sub>0.4</sub> Co <sub>0.3</sub> Ni <sub>0.3</sub> -1.8 | 10                       | 1.62         | Energy Environ. Mater. 2023, 0, e12590          |
| Co/CoO@NC@CC                                               | 10                       | 1.66         | Chem. Eng. J. 2021, 414, 128804                 |
| Co/Mo <sub>2</sub> C@C                                     | 10                       | 1.59         | Chem. Eng. J. 2022, 430, 132697                 |
| Co <sub>0.43</sub> Ni <sub>0.57</sub> @C                   | 10                       | 1.62         | Int. J. Hydrogen Energy 2022, 47, 3699-3708     |
| Ni/Co <sub>3</sub> O <sub>4</sub>                          | 10                       | 1.63         | Nano-Micro Lett. 2022, 14, 148                  |
| Co <sub>9</sub> S <sub>8</sub> /Cu <sub>2</sub> S/CF       | 10                       | 1.60         | ACS Appl. Mater. Interfaces 2021, 13, 9865-9874 |
| FeOOH/Ni <sub>3</sub> N                                    | 10                       | 1.58         | Appl. Catal., B 2020, 269, 118600               |
| V-Ni <sub>3</sub> S <sub>2</sub> @NiFe LDH                 | 10                       | 1.55         | J. Mater. Chem. A 2019, 7, 18118-18125          |
| Co <sub>3</sub> S <sub>4</sub> @MoS <sub>2</sub>           | 10                       | 1.58         | Nano Energy 2018, 47, 494-502                   |
| Co(OH) <sub>2</sub> /Ag/FeP                                | 10                       | 1.56         | ACS Appl. Mater. Interfaces 2019, 11, 7936-7945 |
| d-Ni <sub>3</sub> FeN/Ni <sub>3</sub> Fe                   | 10                       | 1.61         | J. Mater. Chem. A 2021, 9, 4036-4043            |

## References

1. G. Kresse and J. Furthmuller, Efficient iterative schemes for ab initio total-energy calculations using a plane-wave basis set, *Phys. Rev. B*, 1996, **54**, 11169–11186.
2. G. Kresse and J. Furthmuller, Efficiency of ab-initio total energy calculations for metals and semiconductors using a plane-wave basis set, *Comput. Mater. Sci.*, 1996, **6**, 15–50.
3. P. E. Blöchl, Projector augmented-wave method, *Phys. Rev. B*, 1994, **50**, 17953–17979.
4. J. P. Perdew, K. Burke and M. Ernzerhof, Generalized gradient approximation made simple, *Phys. Rev. Lett.*, 1996, **77**, 3865–3868.
